# Supplementary material for: Neutrality and Robustness in Evo-Devo: Emergence of Lateral Inhibition
Source: PubMed Central journal article supplement (PMC2577890; doi:10.1371/journal.pcbi.1000226), 2008-11-21
Supplement: pcbi.1000226.s002.pdf [file pcbi.1000226.s002.pdf]

Apr 21, 08 10:31

AllPatterns.py

Page 1/2

```

## (c) 2008, Andreea Munteanu
## Initiated October 2007, Santa Fe Institute

from numpy import *
from gene_net import *
import pickle
from RandomArray import *
from time import time, asctime
import socket

def save2file( _file, Patterns ):
    out_file = open(_file, 'w')
    pickle.dump(Patterns, out_file)
    out_file.close()

#####
NumCells = 8
Width = 4
stoch_runs = 1 #will not be used.

t_start= time()

N = int( sys.argv[1] )
H = int( sys.argv[2] )
Width = int (sys.argv[3] )
id1 = int( sys.argv[4] )
id2 = int( sys.argv[5] )
part_idx = sys.argv[6]

if Width > 1 :
    out_filename = "2DHEX_N%d_H%d" % (N, H)
else:
    out_filename = "1D_N%d_H%d" % (N, H)
if len(sys.argv) > 5 :
    out_filename = out_filename + ".Part" + part_idx

log_filename = out_filename + ".log"
log_file = open(log_filename, 'w')
log_file.write ("Command:%s\n" % sys.argv )
log_file.write ("On host:%s\n" % socket.gethostname() )
log_file.write("Launched:%s\n" % asctime())
log_file.close()

G = N - H
OutputPatterns = {}

Max_id = pow( 3, N*N - H*H)
id2 = min( id2, Max_id )
for net_id in range ( id1, id2 ):

    W = generate_topology ( N, H, net_id )
    assert ( is_restricted ( W, G, H ))

    avg_organism = run_topology ( W, G , H, Width, NumCells )

    genes_stability = organism_stability ( avg_organism )

    if alltrue(equal( genes_stability, True )):
        string_pattern = organism_to_string ( avg_organism)
    else:
        string_pattern = "U"

    if string_pattern not in OutputPatterns.keys():
        OutputPatterns[string_pattern] = []
    OutputPatterns[string_pattern].append( net_id )

```

Apr 21, 08 10:31

AllPatterns.py

Page 2/2

```

    if ( net_id % 1000 == 0):
        save2file ( out_filename, OutputPatterns )

save2file ( out_filename, OutputPatterns )
t_end = time()

log_file = open(log_filename, 'a')
log_file.write("Duration:%d" % int(t_end - t_start) )
log_file.close()

```

```

Apr 21, 08 10:31      gene_net.py      Page 1/9
## (c) 2008, Andreea Munteanu
## Initiated October 2007, Santa Fe Institute

import numpy
import random
from numpy import alltrue, sometrue, equal
from numpy import concatenate, ones, zeros, dot, array, array2string
from math import fabs, ceil, modf

noise_flag = False

def set_noise_flag ( _bool ):
    global noise_flag
    noise_flag = _bool

def to_base3( n ):
    digit = [str( n%3 )]
    if n < 3:
        return digit
    else:
        return to_base3( n / 3 ) + digit

##### UTILS:

#Topology:

def new_int_weights( n ):
    return numpy.random.randint( -1, 2, ( n, n ) )
    #g+h random arrays of g+h int elements.

def restrict_topology ( weights, g, h ):
    #hormones do not affect hormones.
    for i in range( g+h ):
        for j in range ( g+h ):
            if i >= g and j >= g:
                weights[i][j] = 0

def is_restricted( weights, g, h ):
    for i in range( g+h ):
        for j in range ( g+h ):
            if i >= g and j >= g and weights[i][j] != 0:
                return False
    return True

def generate_topology ( N, H, net_id): #needs refactoring
    G = N - H
    State = [ 0, -1, 1]
    interactions3 = to_base3 ( net_id )

    #base3_to_gene_interactions
    interactions = zeros ( len ( interactions3))
    for i in range( len(interactions3)):
        interactions[i] = State[int(interactions3[i])]

    #Restrict the topology: interactions to weights
    W = zeros ( (N,N) )
    k = len (interactions) - 1
    for i in range ( N - 1, -1, -1 ):
        for j in range ( N -1, -1, -1):
            if i < G or j < G:
                W[i,j] = interactions[k]
                k -= 1
            if k < 0: break

```

```

Apr 21, 08 10:31      gene_net.py      Page 2/9
        if k < 0: break
        return W

def get_net_id ( W, N, H ):
    State={}
    State[0] = 0
    State[-1] = 1
    State[1] = 2
    _elements = N*N-H*H
    interactions = zeros ( _elements)
    k = len (interactions) - 1
    for i in range ( N - 1, -1, -1 ):
        for j in range ( N -1, -1, -1):
            if i < N-H or j < N-H:
                interactions[k] = State[W[i,j]]
                k -= 1
    index = 0
    for i in range(_elements):
        index += interactions[i]*pow(3,_elements - i - 1)
    return int(index)

def check_networks_equivalence (net_id1, net_id2, N, H, gene1, gene2):
    W1 = generate_topology ( N, H, int(net_id1))
    W2 = generate_topology ( N, H, int(net_id2))

    if ( array2string(W1[0:N-H, 0:N-H]) == array2string(W2[0:N-H, 0:N-H]) ):
        if (array2string(W1[ gene1,:]) == array2string(W2[ gene2,:])
            and array2string(W1[ gene2,:]) == array2string(W2[ gene1,:]) ):
            if ( array2string(W1[:,gene1]) == array2string(W2[:,gene2]) and
                array2string(W1[:,gene2]) == array2string(W2[:,gene1]) ):
                return True
    return False

def neighbors_of ( net, N, H ):
    Neighbors = []
    W = generate_topology ( N, H, net )
    for i in range(N):
        for j in range(N):
            if i < N-H or j < N-H:
                States = [0,-1,1]
                _state = W[i][j]
                States.remove ( W[i][j] )
                while ( len(States) > 0 ):
                    W[i][j] = States[0]
                    net_id = get_net_id ( W, N, H )
                    Neighbors.append( net_id )
                    States.remove ( W[i][j] )
                W[i][j] = _state
    net_id = get_net_id ( W, N, H )
    assert (net_id == net)
    return Neighbors

def networks_distance ( W1, W2, N ):
    distance = 0
    assert ( len(W1) == len(W2))
    for i in range( N ):
        for j in range ( N ):
            if W1[i][j] != W2[i][j]:
                distance += 1
    return distance

def networks_distance_id ( net_id1, net_id2, N, H ):
    W1 = generate_topology ( N, H, net_id1)
    W2 = generate_topology ( N, H, net_id2)

```

Apr 21, 08 10:31

gene\_net.py

Page 3/9

```

return networks_distance(W1,W2, N)

def organisms_distance ( o1, o2 ):
assert ( len( o1 ) == len( o2 ) and ( len(o1[0]) == len(o2[0]) ) ),
'Compare organisms of diff lengths! %d %d' % ( len( o1 ), len( o2 ) )
width = len(o1)
num_cells = len( o1[0] )
num_genes = len(o1[0][0])
distance = zeros ( (width, num_genes) )
for j in range ( width ):
for i in range ( num_genes ):
for c in range ( num_cells ):
g_reporter_1 = o1[j][c][i]
g_reporter_2 = o2[j][c][i]
diff = (g_reporter_1 - g_reporter_2)
distance[j][i] += diff * diff
distance[j][i] /= num_cells
return distance

## Cell states:
def new_cell_state( n ):
return array( [0] * n )

## Tissue / Organism:
def new_organism( num_cells, n ):
return [ rnd_state( n ) for i in range(num_cells) ]

def crafted_organism( mtx ):
return [ [array(1) for l in mtx] ]

def crafted_stripes ( num_cells, all_genes, width = 1 ):
pattern = zeros ( all_genes )
organism = [ [ pattern for l in range(num_cells) ] ]
for i in range(width):
organism[i][:2] = [ ones( all_genes ) for l in range( int(ceil(num_cell
s/2.)) ) ]
return organism

def print_organism ( o ):
for c in o:
print_cell_state ( c )

def equal_organisms( o1, o2 ):
if equal(o1,o2).all():
return True
else:
return False

def copy ( organism ):
result = list([])
for cell in organism:
result.append ( array(list(cell)) )
return result

##String utils:
def netID_to_string ( net_id, N, H ):
W = generate_topology ( N, H, net_id )
return top_to_string( W )

```

Tuesday April 22, 2008

gene\_net.py

Apr 21, 08 10:31

gene\_net.py

Page 4/9

```

def top_to_string( W ):
_topology = ''
N = len( W )
for i in range( N ):
for j in range( N ):
if W[i][j] < 0:
_topology += 'I'
elif W[i][j] > 0:
_topology += 'A'
elif W[i][j] == 0:
_topology += '-'
else:
_topology += 'Non integer values'
assert ( len( _topology ) == N*N )
return _topology

def top_to_array ( top_string ):
N = len( top_string )
assert ( N == (G+H)*(G+H) ), \
'Topology size %d %d!' % ( N, (G+H)*(G+H) )
W = zeros( (G+H)*(G+H) )
i = 0
for s in top_string:
if s == 'A':
W[i] = 1
elif s == 'I':
W[i] = -1
i += 1
W = resize(W, (G+H,G+H))
return W

def gene_patt_to_string( o, g_id ):
_pattern= ''
for c in range( len(o) ):
_pattern += 'int( o[c][g_id] )'
return _pattern

def organism_to_string ( o ):
_pattern = ''
width = len(o)
num_cells = len(o[0])
num_genes = len(o[0][0])
for i in range(width):
for g in range( num_genes ):
for c in range( num_cells):
#_pattern += 'int( o[c][g] )'
_pattern += str(int( o[i][c][g] ))
_pattern += '|'
_pattern += '@'
return _pattern[:-1]

def string_to_organism ( organism_str, N, Cells ):
result = []
tmp = [zeros( ( N ) ) for i in range( Cells ) ]
_id = 0
_w = 0
while _id < len(organism_str) :
if organism_str[_id] == '@':
result.append(tmp)
_w += 1
_id += 1
else:
g = 0
while g < N:
if organism_str[_id] != '|':

```

3/8

Apr 21, 08 10:31

gene\_net.py

Page 5/9

```

tmp[ (_id - (N * Cells +N + 1)*_w - g)%Cells ][g] = \
    int(organism_str[_id])
    else:
        g += 1
        _id += 1
result.append(tmp)
return result

def string_distance (s1, s2):
    distance = 0
    assert ( len(s1) == len(s2) )
    for i in range(len(s1)):
        if s1[i] != s2[i]:
            distance += 1
    return distance

#####
#### STABILITY:
def gene_is_stable ( organism, g_id ):
    width = len(organism)
    for j in range(width):
        for cell in organism[j]:
            ( remainder, integer ) = modf( cell[g_id] )
            if remainder > 0:
                return False
    return True

def organism_stability ( organism ): #Stability of all genes is considered.
    width = len(organism)
    num_cells = len(organism[0])
    num_genes = len( organism[0][0] )
    Stability = [ True ] * num_genes
    for g in range( num_genes ):
        Stability[g] = gene_is_stable ( organism, g )

    return Stability

#### ROBUSTNESS:
def network_organism_robustness ( weights, pattern, N, H, NumCells ):
    #the average of gene robustness:
    # the response is in (0,1) with step 1./(N*NumCells)
    result = network_gene_robustness ( weights, pattern, N, H, NumCells )
    NetRobustness = 0.0
    for R in result:
        NetRobustness += R
    NetRobustness /= N
    return NetRobustness

def gene_robustness ( o , W, G, H, g_idx):
    #perturb gene g_idx serially in all cells
    #and check if the final organism is the same
    #the response is in (0,1) with step 1./(NumCells*Width).
    initial_pattern = organism_to_string ( o )
    robustness = 0
    width = len(o)
    NumCells = len(o[0])
    for cell_y in range(width) :
        for cell_x in range(NumCells):
            perturbed_pattern = \
                perturb_gene(copy(o), W, G, H, g_idx, cell_x, cell_y )
            if perturbed_pattern == initial_pattern :
                robustness += 1

```

Apr 21, 08 10:31

gene\_net.py

Page 6/9

```

robustness /= float(NumCells * width )
return robustness

def network_gene_robustness ( weights, pattern, N, H, NumCells ):
    result = []
    organism = string_to_organism ( pattern, N, NumCells )
    for g_idx in range(N):
        robustness = gene_robustness (copy(organism), weights, N-H, H, g_idx)
        result.append ( robustness )
    return result

def perturb_gene ( o, W, G, H, g_idx, cell_x, cell_y = 0):
    o[cell_y][cell_x][g_idx] = 1 - o[cell_y][cell_x][g_idx]
    for i in range(15):
        o = next_organism( o, W, G, H )
    string_pattern = organism_to_string ( o )
    return string_pattern

#### TIME PROGRESSION:
def mixed_cell_state( middle, neigh, g ): #Hormones mixed states.
    ors = OR_function (neigh, g )
    return concatenate( (middle[0:g], ors) )
    #Genes remain unchanged. Have no mixed states.

def OR_function (neigh, g ):
    ors = neigh[0][g:]
    for i in range(1, len(neigh)):
        ors = map(lambda a,b: a or b, ors, neigh[i][g:] )
    return ors

def cell_neighbors ( o, x, y , system ):
    #x denotes horizontal index, cell index
    #y denotes vertical index, width index
    neigh = []
    width = len(o)
    length = len(o[0])
    if system == 'LINE':
        assert ( width == 1 )
        if x == 0:
            neigh = [ o[0][1] ]
        elif x == length - 1:
            neigh = [ o[0][-2] ]
        else:
            neigh = [ o[0][x-1], o[0][x+1] ]
    #####
    if system == 'HEX':
        if y%2 != 0: #even row
            shift = 0
        else: #odd row
            shift = -1

    #periodic vertical boundary:
    y_lower = (y + 1) % width
    y_upper = (width + y - 1) % width
    if x == 0:
        neigh = [ o[y][x+1], o[y_lower][x+1+shift], o[y_upper][x+1+shift] ]
        if x+shift >= 0:
            neigh.append ( o[y_lower][x+shift] )
            neigh.append ( o[y_upper][x+shift] )

    elif x == length - 1:
        neigh = [ o[y][x-1], o[y_lower][x+shift], o[y_upper][x+shift] ]
        if x+1+shift < length:

```

Apr 21, 08 10:31

gene\_net.py

Page 7/9

```

neigh.append (o[y_lower][x+1+shift] )
neigh.append (o[y_upper][x+1+shift] )
else:
    neigh = [ o[y][x-1], o[y][x+1], \
              o[y_lower][x+shift], o[y_lower][x+1+shift],\
              o[y_upper][x+shift], o[y_upper][x+1+shift] ]
return neigh

def next_cell_state( cell_state, weights):
    if 2 in cell_state :
        return cell_state
    else:
        sums = dot( cell_state, weights ) # Matrix dot product
        ( remainder, integer ) = modf( fabs (sum(sum ( weights ))) )
        if remainder > 0:
            return array([ int(int( s + int(noise_flag)*random.random() > 0) )
                           for s in sums ])
        else:
            return array([int(int( s+int(noise_flag)*random.randint(-1,1) > 0) )
                           for s in sums ])

#
def initial_organism ( num_cells, n, width = 1):
    o = []
    for i in range(width):
        o.append([ zeros( n ) for j in range(num_cells) ])
        o[i][0][0] = 1
    return o

def next_organism( o, weights, g, h ):
    result = []
    width = len(o)
    length = len(o[0])
    assert ( length > width )
    # first
    if width == 1:
        system = 'LINE'
    else: #extendable to other neighborhoods
        system = 'HEX'
    for y in range( width ) :
        line = []
        for x in range(length):
            mx = mixed_cell_state( o[y][x], cell_neighbors(o, x, y, system ), g)
            line.append( next_cell_state( mx, weights ))
        result.append ( line )
    return result

def average_organism ( o, weights, g, h, steps ):
    width = len(o)
    num_cells = len( o[0])
    avg_organism = [ ]
    for i in range(width):
        avg_organism.append( [zeros( (g + h) ) for i in range( num_cells )] )

    for r in range( steps ):
        o = next_organism(o, weights, g, h )
        for j in range(width):
            for i in range( num_cells ):
                avg_organism[j][i] = avg_organism[j][i] + o[j][i]
    for j in range(width):
        for i in range( num_cells ):
            avg_organism[j][i] = avg_organism[j][i]/float(steps)
    return avg_organism

```

Tuesday April 22, 2008

gene\_net.py

Apr 21, 08 10:31

gene\_net.py

Page 8/9

```

def after_transient_organism ( o, weights, g, h ):
    num_cells = len( o[0] )
    width = len(o)
    time_steps = 10 * num_cells * width
    for r in range( time_steps ): #Transient.
        tmp_o = o
        o = next_organism( o, weights, g, h )
        if equal(o,tmp_o).all():
            break
    return o

def get_pattern ( o, weights, g, h ):
    o = after_transient_organism ( o, weights, g, h )
    check_steps = len(o[0])
    return average_organism ( o, weights, g, h, check_steps )

#
def run_topology ( W, G, H, w , NumCells ):
    _output_pattern = []
    for j in range( w ):
        _output_pattern.append( [ zeros( (G + H) ) for i in range( NumCells )] )

    iterations = 1
    if noise_flag:
        iterations = 100

    for i in range ( iterations ):
        o = initial_organism ( NumCells, G + H, w ) #Random initial condition.
        pattern = get_pattern ( o, W, G, H )

        for j in range(w):
            for c in range( NumCells ):
                _output_pattern[j][c] = pattern[j][c] + _output_pattern[j][c]
    for j in range(w):
        for c in range( NumCells):
            _output_pattern[j][c] /= iterations
    return _output_pattern

##### EVOLUTION:
def mutate_topology ( net_id, N, H ):
    States = [ 0, -1, 1]
    G = zeros((N,N))
    indexes = N*N - H*H
    idx = random.randint ( 0, indexes-1)
    W = generate_topology ( N, H, net_id)
    _it = 0
    _found = False
    for i in range(N):
        for j in range(N):
            if i < N-H or j < N-H:
                if _it == idx:
                    _found = True
                    break
            else:
                _it += 1
    if _found == True:
        break

    G = generate_topology ( N, H, net_id)
    States.remove(G[i][j])

    idx_state = random.randint ( 0, len(States)-1 )
    G[i][j] = States[idx_state]
    assert (G[i][j] != W[i][j] )
    change = (W[i][j], G[i][j] )

```

5/8

Apr 21, 08 10:31

gene\_net.py

Page 9/9

```
#this is just to make sure now (case (4,2)).
assert (G[2][2] == 0 and G[2][3] == 0 and \
        G[3][2] == 0 and G[3][3] == 0)
m_net_id = get_net_id ( G, N, H)
assert ( networks_distance_id ( m_net_id, net_id, 4, 2 ) == 1 )
return m_net_id, change
```

Apr 21, 08 10:31

test\_gene\_net.py

Page 1/3

```

## (c) 2008, Andreea Munteanu
## Initiated October 2007, Santa Fe Institute

from gene_net import *
from math import fabs
import unittest

def check_evol( o, W, lst ):
    for l in lst:
        o = next_organism( o, W, 1, 1 )
        ml = crafted_organism( l )
        if not equal_organisms( o, ml ):
            return False
    return True

class TestGeneNet1(unittest.TestCase):
    def setUp(self):
        pass
    def tearDown(self):
        pass

    def test_mixed_state(self):
        s1 = mixed_cell_state( array([0,0]), [ [], array([0,1])], 1 )
        self.assert_( s1[0] == 0 and s1[1] == 1 )

        s2 = mixed_cell_state( array([0,1,1]), [ [], array([0,1,1]) ], 1 )
        self.assert_( s2[0] == 0 and s2[1] == 1 and s2[2] == 1 )

        neigh = [ [1,1,0,0], [1,1,1,0], [1,1,1,0], [1,1,0,0], [1,1,1,0], [1,1,1,
0] ]
        s3 = mixed_cell_state( array([0,1,0,0]), neigh, 2 )
        self.assert_( (s3[0] == 0 and s3[1] == 1 and s3[2] == 1 and s3[3] == 0),
s3 )

    def test_next_state(self):
        W = array([[1,1],[-1,0]])
        state = [1,1]
        s1 = next_cell_state(state, W )
        self.assert_( s1[0] == 0 and s1[1] == 1 ,
'Next State: %s' % repr(s1) )

    def test_state_sequence(self):
        W = array([[0,1],[1,0]])
        o = crafted_organism( [[1,0],[0,0],[0,0],[0,0],[0,0]] )

        self.assert_( check_evol( o, W, [ [[0,1],[0,0],[0,0],[0,0],[0,0]],
[[0,0],[1,0],[0,0],[0,0],[0,0]],
[[0,0],[0,1],[0,0],[0,0],[0,0]],
[[1,0],[0,0],[1,0],[0,0],[0,0]] ] )

    def test_string (self):
        o = crafted_organism( [[1,0],[1,0],[0,1],[0,0],[0,1]] )
        o_string = organism_to_string ( o )
        o_string_test = "1100000101"
        self.assert_( o_string == o_string_test,
' The organisms are: %s %s ' % (o_string, o_string_test) )

    def test_distance(self):
        g = 1
        h = 1

        o3 = crafted_stripes ( 5, 2 )
        o1 = crafted_organism( [[1,0],[1,1],[1,0],[1,1],[1,0]] )
        o2 = crafted_organism( [[1,0],[0,1],[1,0],[0,1],[1,0]] )

```

Apr 21, 08 10:31

test\_gene\_net.py

Page 2/3

```

D1 = organisms_distance ( o1, o2 )
D2 = organisms_distance ( o3, o2 )
self.assert_( sometrue(equal( D1, 0 )),
'Distance: %s' % repr( D1 ) )
self.assert_( sometrue(equal( D1, 0 )) and sometrue(equal( D2, 1 )),
'Distance: %s' % repr( D2 ) )

def test_pattern(self):
    g = 1
    h = 1
    W = array([[1,1],[1,0]])
    o = initial_organism ( 5, 2 )
    target = crafted_organism( [[1,1],[1,1],[1,1],[1,1],[1,1]] )
    pattern = get_pattern ( o, W, g, h )

    #W = generate_topology(4,2,41011)
    #o = initial_organism(5,4)
    #pattern = get_pattern ( o, W, 2, 2 )
    #target = crafted_organism( [[1,0],[0,1],[1,0],[0,1],[1,0]] )
    self.assert_( equal_organisms ( target, pattern), pattern )

def test_hormones_interaction(self):
    g, h = 3,4
    for i in range(30):
        W = new_int_weights ( g + h )
        restrict_topology ( W, g, h )
        H = W[g:,g:]
        self.assert_( alltrue(equal(H,0)) )

def test_stability(self):
    g = 1
    h = 1
    W = array([[1,1],[1,1]])
    o = initial_organism ( 5, 2 )
    pattern = get_pattern ( o, W, g, h )

    Stability = organism_stability ( pattern )
    self.assert_( alltrue(equal (Stability, True)),
'Stability 1: %s %s ' % (repr(Stability), repr(pattern)) )

    W = array([[0,1],[1,0]])
    o = crafted_organism( [[1,0],[0,0],[0,0],[0,0],[0,0]] )
    pattern = get_pattern ( o, W, 1, 1 )

    Stability = organism_stability ( pattern )
    self.assert_( sometrue(equal(Stability, False)),
'Stability 2: %s' % repr( Stability ) )

def test_organism_operations(self):
    g,h = 1,1
    o = crafted_organism([ [1,0],[0,1],[1,0],[0,1],[1,0]] )
    cells = len(o[0])
    o1 = copy(o)
    self.assert_( equal_organisms ( o, o1 ) )
    o1[0][1][1] = 1 - o1[0][1][1]
    self.assert_( not equal_organisms ( o, o1 ) )
    o[0][1][1] = 1 - o[0][1][1]
    self.assert_( equal_organisms ( o, o1 ) )
    o_str = organism_to_string ( o )
    o2 = string_to_organism ( o_str, g+h, cells )
    self.assert_( equal_organisms ( o, o2 ), o2 )

def test_topology_equivalence ( self):
    net_id1 = 41010
    net_id2 = 15122

```

Apr 21, 08 10:31

test\_gene\_net.py

Page 3/3

```

        net_id3 = 41038
        self.assert_( check_networks_equivalence ( net_id1, net_id2, 4, 2 , 2, 3
) )
        self.assert_( not check_networks_equivalence ( net_id1, net_id3, 4, 2 ,
2, 3) )

def test_topology_robustness (self):
    net_id = 41011
    N = 4
    H = 2
    Cells = 4
    width = 1
    W = generate_topology ( N, H, int(net_id) )
    avg_organism = run_topology ( W, H , N-H, width, Cells )
    genes_stability = organism_stability ( avg_organism )
    _pattern = ''
    if alltrue(equal( genes_stability, True )):
        _pattern = organism_to_string ( avg_organism)
    assert ( _pattern == "1010|0101|1010|0101|" )

    organism = string_to_organism ( _pattern, N, Cells )
    NetRobustness = 0.0
    R_genes = network_gene_robustness ( W, _pattern, N, H, Cells )
    assert ( len(R_genes) == N )
    R_net = sum(R_genes)/float(N)
    self.assert_( R_net == 1.0 )

def test_net_index (self):
    net_id = 41010
    W = generate_topology ( 4, 2, int(net_id) )
    net_id1 = get_net_id ( W, 4, 2 )
    self.assert_( net_id == net_id1, 'Ids:%d%d' % (net_id, net_id1))

if __name__ == '__main__':
    unittest.main()

```
